# Supplementary material for: Performance comparison of two commercial human whole-exome capture systems on formalin-fixed paraffin-embedded lung adenocarcinoma samples
Source: Springer Nature journal article supplement (doi:10.1186/s12885-016-2720-4), 2016-08-30

**Fig. S1**

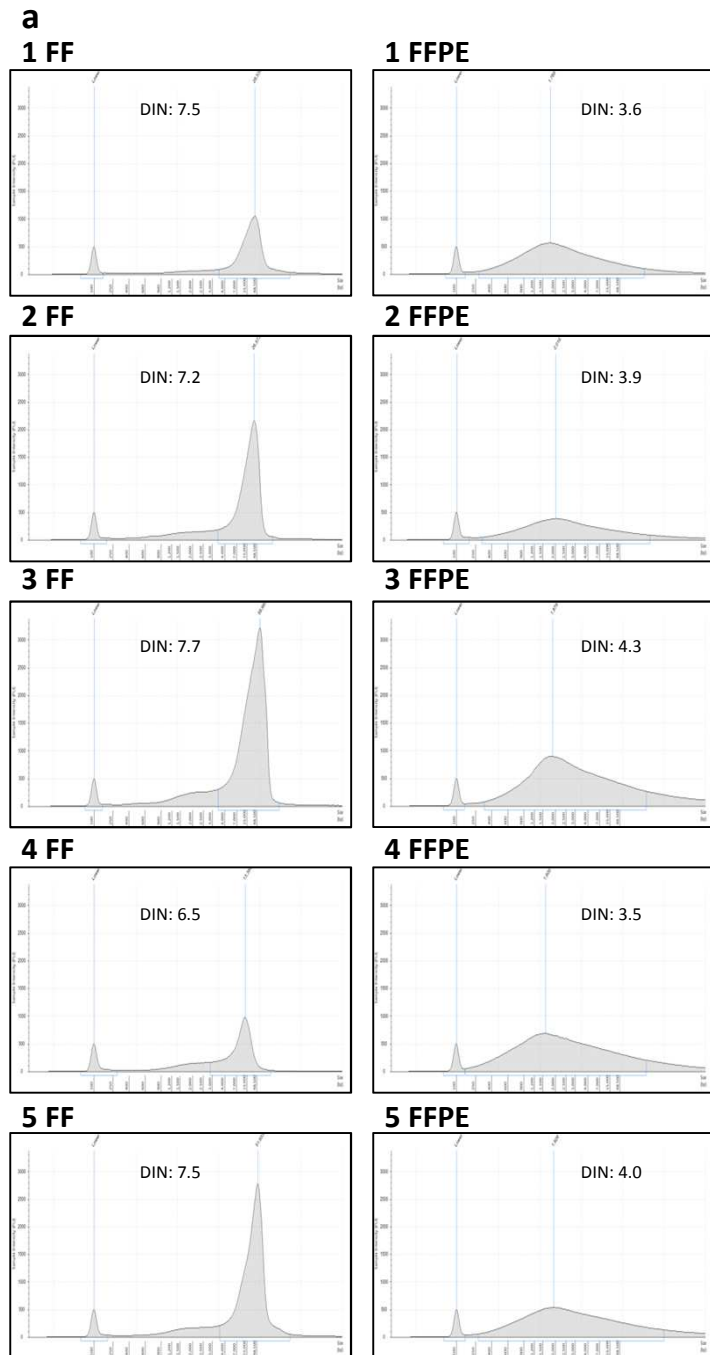

**b**

| Patient ID | Tumor Type | NanoDrop [ng/ul] | 260/280 | 260/230 | QuBit [ng/ul] | AYR  | TapeStation [ng/ul] | DIN | Range Size (bp) | Peak Size (bp) |
|------------|------------|------------------|---------|---------|---------------|------|---------------------|-----|-----------------|----------------|
| 1          | FF         | 87.6             | 1.9     | 1.9     | 41.7          | n.d. | 64.6                | 7.5 | 3491- >60000    | 28534          |
|            | FFPE       | 388.5            | 1.8     | 2.2     | 41.7          | 0.53 | 133.0               | 3.6 | 273- >60000     | 1789           |
| 2          | FF         | 422.3            | 1.9     | 2.1     | 41.0          | n.d. | 111.0               | 7.2 | 3410- >60000    | 26573          |
|            | FFPE       | 209.2            | 1.9     | 2.2     | 53.0          | 0.56 | 88.3                | 3.9 | 298- >60000     | 2016           |
| 3          | FF         | 582.5            | 1.8     | 2.2     | 46.0          | n.d. | 219.0               | 7.7 | 3445- >60000    | 58987          |
|            | FFPE       | 385.0            | 1.8     | 2.2     | 67.6          | 0.68 | 217.0               | 4.3 | 321- >60000     | 1879           |
| 4          | FF         | 68.5             | 1.8     | 2.3     | 27.8          | n.d. | 44.2                | 6.5 | 2880- >60000    | 13394          |
|            | FFPE       | 368.8            | 1.8     | 2.2     | 45.1          | 0.53 | 185.0               | 3.5 | 154- >60000     | 1600           |
| 5          | FF         | 237.9            | 1.8     | 2.2     | 59.0          | n.d. | 133.0               | 7.5 | 3563- >60000    | 51653          |
|            | FFPE       | 460.1            | 1.8     | 2.2     | 55.0          | 0.61 | 149.0               | 4.0 | 270- >60000     | 1926           |

**c**

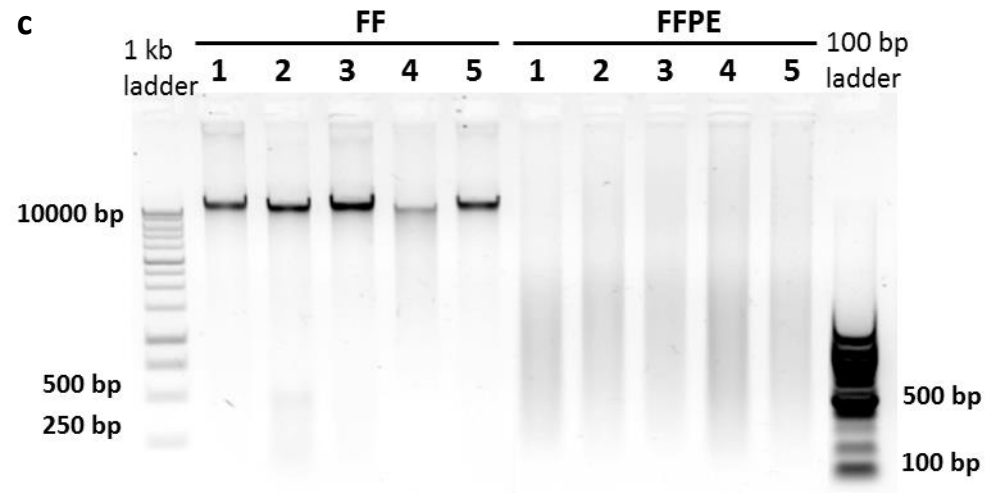

Fig. S2

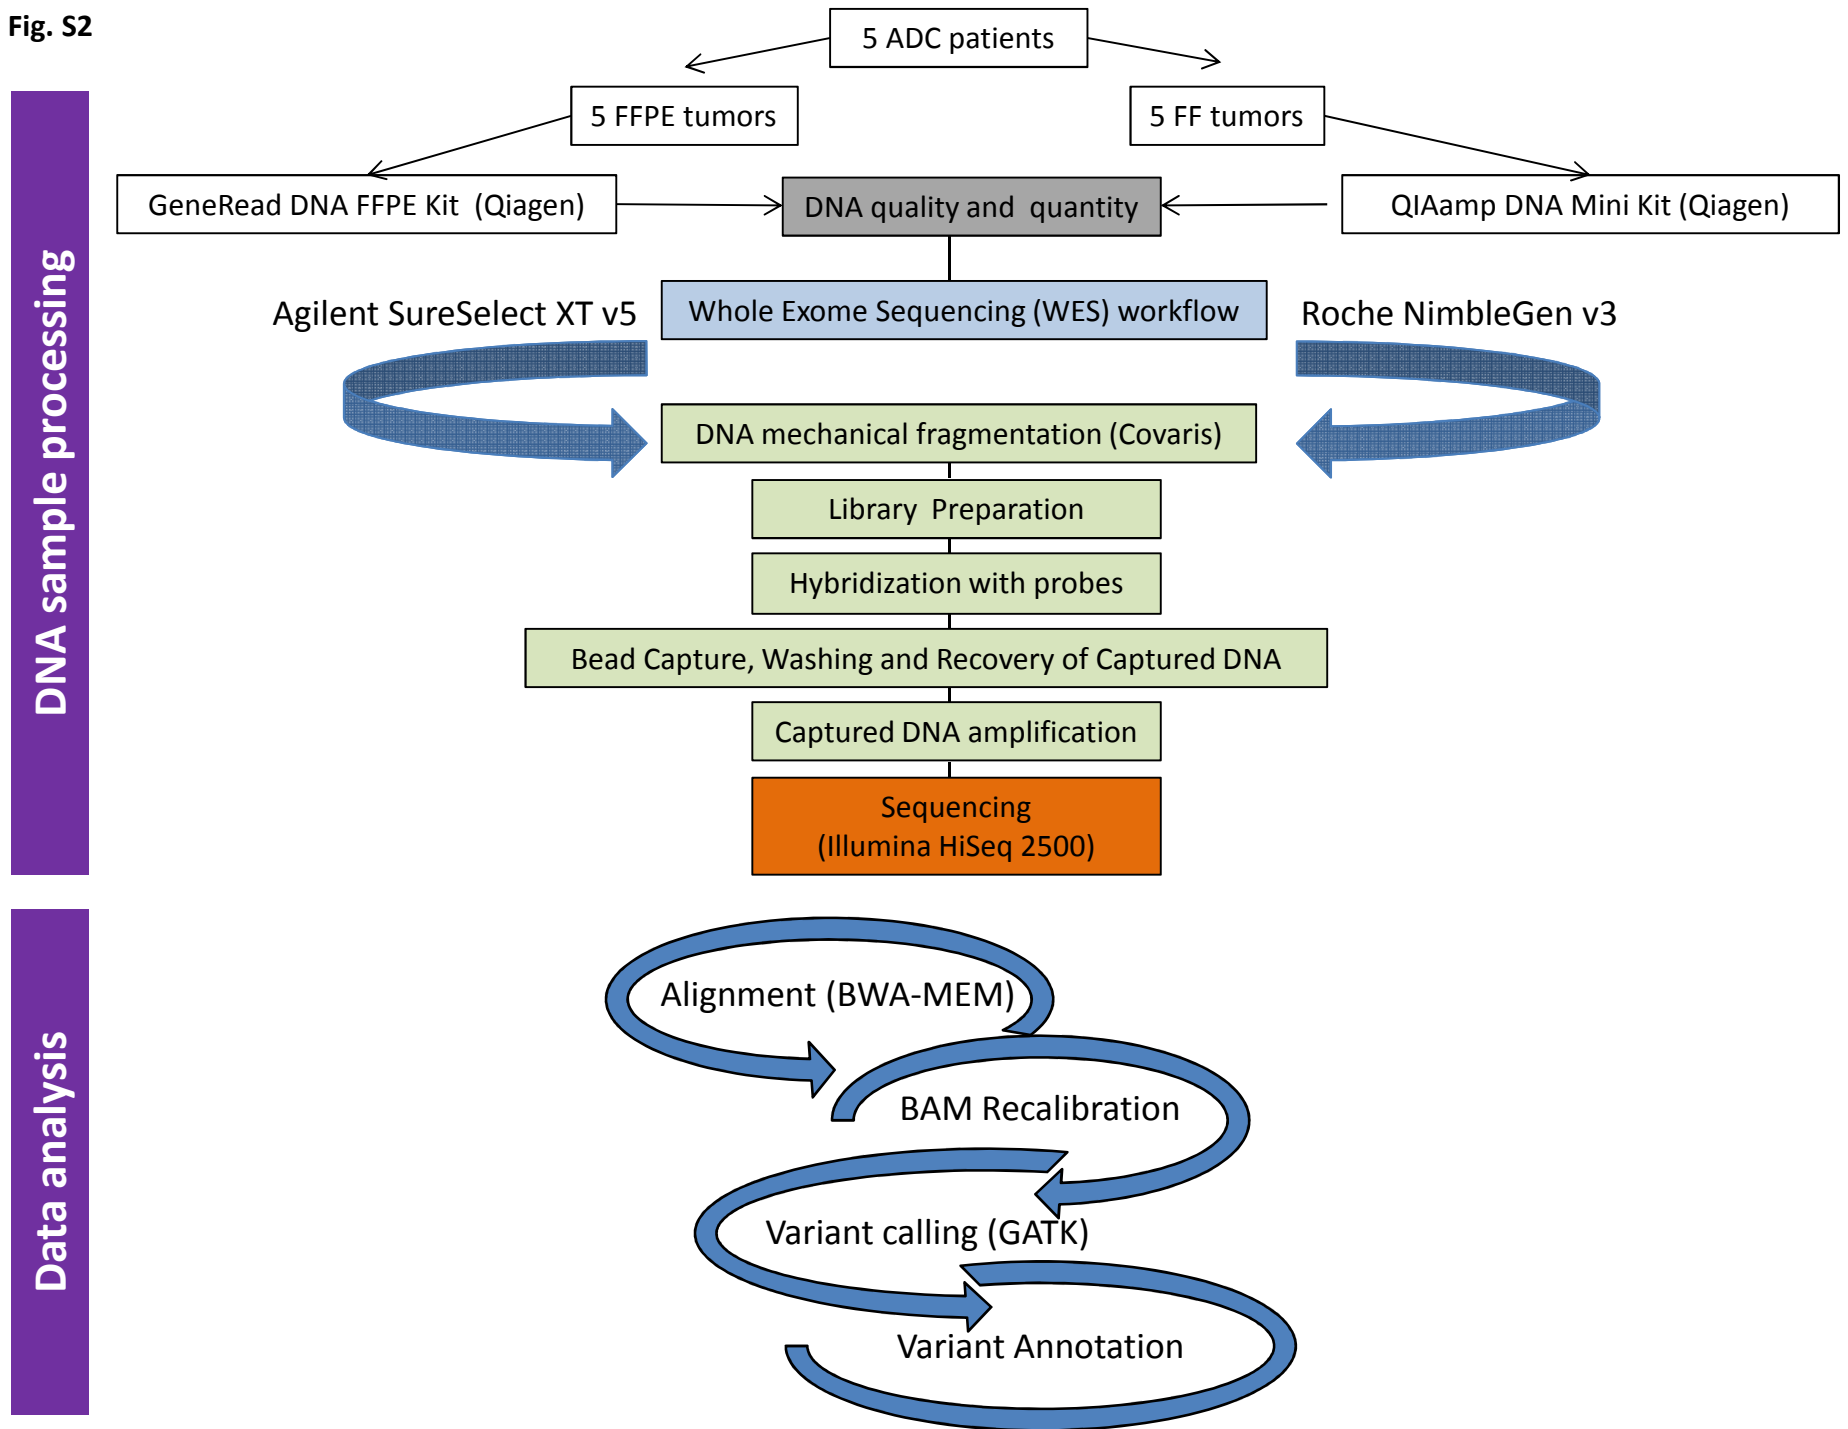

Supplement: MOESM1 [file 10632612]
